# Supplementary material
Source: PubMed Central journal article supplement (PMC2705043)
Supplement: pp.109.137125_1.pdf [file pp.109.137125_1.pdf]

pGXT:

.....ggaattcgattat ggatcc ccaatact tgtatgg.....ccdB.....ccatacaa gtattgg ggatcc ataatcactagtgaattc.....  
pGEM-T backbone *Bam*HI *Xcm*I *Xcm*I *Bam*HI pGEM-T backbone

pXSN and pCXSN:

.....cgaacgatactcgaggg ggatcc ccaatact tgtatgg.....ccdB.....ccatacaa gtattgg ggatcc actagcgaatttccccgatcgttcaaa.....  
35S promoter *Bam*HI *Xcm*I *Xcm*I *Bam*HI Nos terminator

pXUN and pCXUN:

.....gtgttacttctgcagcccggg ggatcc ccaatact tgtatgg.....ccdB.....ccatacaa gtattgg ggatcc gaatttccccgatcgttcaaa.....  
Ubiquitin promoter *Bam*HI *Xcm*I *Xcm*I *Bam*HI Nos terminator

pXSN-FLAG and pCXSN-FLAG:

.....cgaacgatactcgaggg ggatcc atg,GAT,TAC,AAG,GAT,GAT,GAT,GAT,AAG,cca,ata,ct tgtatgg.....ccdB.....ccatacaa gtattgg ggatcc  
35S promoter *Bam*HI FLAG *Xcm*I *Xcm*I *Bam*HI  
actagcgaatttccccgatcgttcaaa.....  
Nos terminator

pXUN-FLAG and pCXUN-FLAG:

.....gtgttacttctgcagcccggg ggatcc atg,GAT,TAC,AAG,GAT,GAT,GAT,GAT,AAG,cca,ata,ct tgtatgg.....ccdB.....ccatacaa gtattgg ggatcc  
Ubiquitin promoter *Bam*HI FLAG *Xcm*I *Xcm*I *Bam*HI  
gaatttccccgatcgttcaaa.....  
Nos terminator

pXSN-HA and pCXSN-HA:

.....cgaacgatactcgaggg ggatcc atg, TAC,CCA,TAC,GAT,GTT,CCA,GAT,TAC,GCT,cca,ata,ct tgtatgg.....ccdB.....ccatacaa gtattgg ggatcc  
35S promoter *Bam*HI HA *Xcm*I *Xcm*I *Bam*HI  
actagcgaatttccccgatcgttcaaa.....  
Nos terminator

pXUN-HA and pCXUN-HA:

.....gtgttacttctgcagcccggg ggatcc atg, TAC, CCA, TAC, GAT, GTT, CCA, GAT, TAC, GCT, cca, ata, ct tgtatgg.....*ccdB*.....ccatacaa gtattgg ggatcc  
Ubiquitin promoter *Bam*HI HA *Xcm*I *Xcm*I *Bam*HI  
gaattccccgatcgttcaaa.....  
Nos terminator

pXSN-Myc and pCXSN-Myc:

.....cgaacgatactcgaggg ggatcc atg, GAA, CAA, AAG, TTG, ATT, TCT, GAA, GAA, GAT, CTT, cca, ata, ct tgtatgg.....*ccdB*.....ccatacaa gtattgg ggatcc  
35S promoter *Bam*HI Myc *Xcm*I *Xcm*I *Bam*HI  
actagcgaattccccgatcgttcaaa.....  
Nos terminator

pXUN-Myc and pCXUN-Myc:

.....gtgttacttctgcagcccggg ggatcc atg, GAA, CAA, AAG, TTG, ATT, TCT, GAA, GAA, GAT, CTT, cca, ata, ct tgtatgg.....*ccdB*.....ccatacaa gtattgg ggatcc  
Ubiquitin promoter *Bam*HI Myc *Xcm*I *Xcm*I *Bam*HI  
gaattccccgatcgttcaaa.....  
Nos terminator

pXUN-osaMIR528 and pCXUN-osaMIR528:

.....gtgttacttctgcagcccggg ggatcc CAGCAGCAGCCACAGCAAAATTTGGTTTGGGATAGGTAGGTGTTATGTTAGGTCTGGTTTTTTGGCTGT  
Ubiquitin promoter *Bam*HI  
AGCACCAGCAGT tgtatgg.....*ccdB*.....ccatacaa TTCTGGTGCTAGGCTGTTCTGTGGAAGTTTGCAGAGTTTATATTATGGGTTTAATCGTCC  
*Xcm*I *Xcm*I  
ATGGCATCAGCATCAGCAGC ggatcc gaattccccgatcgttcaaa.....  
*Bam*HI Nos terminator

pXDG and pCXDG:

.....tacaagatcctctagcgtaccggtcgccaccATGGGTAAA.....TCCGGACTC,aga,tct,cga,gct,caa,gct,tcg,aat,tct,gca,gtc,gac,ggt,acc,gcg,ggc,ccg,gga,tcc,  
35S promoter *rsgfp* *Bam*HI

cca,ata,ct tgtatgg.....*ccdB*.....ccatacaa gtattgg ggatcc accggatctagataactgatcataa.....cggtcaaacat.....  
*Xcm*I *Xcm*I *Bam*HI Nos terminator

pXDB and pCXDB:

.....tacaagatc ctctagcgtaccggtcgccaccATGGCCTCC.....CTGTTCTG,aga,tct,cga,gct,caa,gct,tcg,aat,tct,gca,gtc,gac,ggt,acc,gcg,ggc,ccg,gga,tcc,  
35S promoter *DsRed* *Bam*HI

cca,ata,ct tgtatgg.....*ccdB*.....ccatacaa gtattgg ggatcc accggatctagataactgatcataa.....cggtcaaacat.....  
*Xcm*I *Xcm*I *Bam*HI Nos terminator

pXGUS-P and pCXGUS-P:

.....ggatcc ccaatact tgtatgg.....*ccdB*.....ccatacaa gtattgg ggatcc ATGTTACGT...GGCAAACAATGA gctcgaattccccgatcggtcaaa.....  
*Bam*HI *Xcm*I *Xcm*I *Bam*HI *GUS* Nos terminator

pXGFP-P and pCXGFP-P:

.....ggatcc ccaatact tgtatgg.....*ccdB*.....ccatacaa gtattgg ggatcc ATGGGTAAA...CTATACAAATGA gctcgaattccccgatcggtcaaa.....  
*Bam*HI *Xcm*I *Xcm*I *Bam*HI *rsgfp* Nos terminator

**Supplemental Figure S1.** Sequence structure of the *Xcm*I-*ccdB*-*Xcm*I cassette in ZeBaTA vectors.

The grey box marks the sequence that will be removed after *Xcm*I digestion.
